# Supplementary material for: Simultaneous Identification of Ten Bacterial Pathogens Using the Multiplex Ligation Reaction Based on the Probe Melting Curve Analysis
Source: PubMed Central journal article supplement (PMC5517457; doi:10.1038/s41598-017-06348-z), 2017-07-19
Supplement: 41598_2017_6348_MOESM1_ESM.pdf [file 41598_2017_6348_MOESM1_ESM.pdf]

# **Simultaneous Identification of Ten Bacterial Pathogens Using the Multiplex Ligation**

## **Reaction Based on the Probe Melting Curve Analysis**

Yixiang Jiang<sup>1</sup>, Lianhua He<sup>1</sup>, Pingfang Wu<sup>1</sup>, Xiaolu Shi<sup>1</sup>, Min Jiang<sup>1</sup>, Yinghui Li<sup>1</sup>, Yiman Lin<sup>1</sup>,

Yaqun Qiu<sup>1</sup>, Fang Bai<sup>2</sup>, Yiqun Liao<sup>3</sup>, Qingge Li<sup>3</sup>, RenLi Zhang<sup>1</sup>, Qinghua Hu<sup>1,2 +</sup>

Affiliation:

<sup>1</sup>Shenzhen Center for Disease Control and Prevention, Shenzhen 518020, China

<sup>2</sup>School of Life Sciences, Shenzhen University, Shenzhen 518000, Guangdong, China

<sup>3</sup>School of Life Sciences, Xiamen University, Xiamen 361005, Fujian Province, China

### **Supplementary Information:**

The supplementary materials of the MLMA assay including reference strains, primer and probe sequences, the discrepant results and the detection results of mixed infection

Table S1 Reference strains used in study

| Reference strains                | Number | Source       | Type        |
|----------------------------------|--------|--------------|-------------|
| <i>Acinetobacter baumannii</i>   | 1      | Shenzhen CDC | ATCC 19606  |
| <i>Bacillus cereus</i>           | 1      | Shenzhen CDC | ATCC 11778  |
| <i>Campylobacter jejuni</i>      | 1      | Shenzhen CDC | ATCC 33292  |
| <i>Enterobacter aerogenes</i>    | 1      | Shenzhen CDC | CMCC 45103  |
| <i>Enterobacter cloacae</i>      | 1      | Shenzhen CDC | CMCC 45301  |
| <i>Enterococcus faecalis</i>     | 1      | Shenzhen CDC | ATCC 29212  |
| <i>Enterobacter sakazakii</i>    | 1      | Shenzhen CDC | ATCC 51329  |
| <i>Klebsiella pneumoniae</i>     | 1      | Shenzhen CDC | ATCC 700603 |
| <i>Listeria monocytogenes</i>    | 1      | Shenzhen CDC | ATCC 19114  |
| <i>Proteus mirabilis</i>         | 1      | Shenzhen CDC | ATCC 29906  |
| <i>Proteus vulgaris</i>          | 1      | Shenzhen CDC | CMCC 49001  |
| <i>Pseudomonas aeruginosa</i>    | 1      | Shenzhen CDC | ATCC 27853  |
| <i>Shigella boydii</i>           | 1      | Shenzhen CDC | CMCC 51265  |
| <i>Shigella dysenteriae</i>      | 1      | Shenzhen CDC | CMCC 51376  |
| <i>Shigella flexneri</i>         | 1      | Shenzhen CDC | ATCC12022   |
| <i>Shigella sonnei</i>           | 1      | Shenzhen CDC | CMCC 51081  |
| <i>Staphylococcus aureus</i>     | 1      | Shenzhen CDC | ATCC 27664  |
| <i>Streptococcus hemolytic-β</i> | 1      | Shenzhen CDC | CMCC 32210  |
| <i>Salmonella aberdeen</i>       | 1      | Shenzhen CDC | CMCC 50313  |
| <i>Salmonella abortus-equi</i>   | 1      | Shenzhen CDC | CMCC 47717  |
| <i>Salmonella adelaide</i>       | 1      | Shenzhen CDC | CMCC 50065  |
| <i>Salmonella anatum</i>         | 1      | Shenzhen CDC | CMCC 50083  |
| <i>Salmonella cholerae-suis</i>  | 1      | Shenzhen CDC | CMCC 47649  |
| <i>Salmonella coli</i>           | 1      | Shenzhen CDC | CMCC 50809  |
| <i>Salmonella dublin</i>         | 1      | Shenzhen CDC | CMCC 50042  |
| <i>Salmonella enteritidis</i>    | 1      | Shenzhen CDC | CMCC 50040  |
| <i>Salmonella gallinarum</i>     | 1      | Shenzhen CDC | CMCC 50770  |
| <i>Salmonella infantis</i>       | 1      | Shenzhen CDC | CMCC 50341  |
| <i>Salmonella javiana</i>        | 1      | Shenzhen CDC | CMCC 50364  |
| <i>Salmonella kentucky</i>       | 1      | Shenzhen CDC | CMCC 50794  |
| <i>Salmonella litchfield</i>     | 1      | Shenzhen CDC | CMCC 50810  |
| <i>Salmonella london</i>         | 1      | Shenzhen CDC | CMCC 50310  |
| <i>Salmonella Manchester</i>     | 1      | Shenzhen CDC | CMCC 50380  |
| <i>Salmonella manhattan</i>      | 1      | Shenzhen CDC | CMCC 50151  |
| <i>Salmonella meleagridis</i>    | 1      | Shenzhen CDC | CMCC 50329  |
| <i>Salmonella minnesota</i>      | 1      | Shenzhen CDC | CMCC 50061  |
| <i>Salmonella moscow</i>         | 1      | Shenzhen CDC | CMCC 50044  |
| <i>Salmonella muenchen</i>       | 1      | Shenzhen CDC | CMCC 50125  |
| <i>Salmonella newport</i>        | 1      | Shenzhen CDC | CMCC 50029  |
| <i>Salmonella oranienburg</i>    | 1      | Shenzhen CDC | CMCC 50379  |
| <i>Salmonella paratyphi A</i>    | 1      | Shenzhen CDC | CMCC 50001  |

|                                       |   |               |                   |
|---------------------------------------|---|---------------|-------------------|
| <i>Salmonella paratyphi B</i>         | 1 | Shenzhen CDC  | CMCC 50004        |
| <i>Salmonella paratyphi C</i>         | 1 | Shenzhen CDC  | CMCC 50017        |
| <i>Salmonella typhi</i>               | 1 | Shenzhen CDC  | CMCC 50097        |
| <i>Salmonella typhi-suis</i>          | 1 | Shenzhen CDC  | CMCC 50734        |
| <i>Salmonella typhimurium</i>         | 1 | Shenzhen CDC  | CMCC 50013        |
| <i>Vibrio cholerae</i>                | 1 | Shenzhen CDC  | ATCC 14101        |
| <i>O1 Vibrio cholerae</i>             | 1 | Shenzhen CDC  | clinicaï isolates |
| <i>O139 Vibrio cholerae</i>           | 1 | Shenzhen CDC  | clinicaï isolates |
| <i>Vibrio parahaemolyticus</i>        | 1 | Shenzhen CDC  | ATCC17082         |
| <i>Vibrio parahaemolyticus (tdh+)</i> | 2 | Shenzhen CDC  | clinicaï isolates |
| <i>Vibrio vulnificus</i>              | 1 | Guangdong CDC | ATCC 27562        |
| <i>Vibrio mimicus</i>                 | 1 | China CDC     | clinicaï isolates |
| <i>Vibrio fluvialis</i>               | 1 | China CDC     | clinicaï isolates |
| <i>Vibrio alginolyticus</i>           | 3 | China CDC     | clinicaï isolates |
| <i>Plesiomons shigelloides</i>        | 1 | Shenzhen CDC  | clinicaï isolates |
| <i>Aeromonas</i>                      | 3 | Shenzhen CDC  | clinicaï isolates |
| <i>Enterotoxigenic E.coli</i>         | 1 | Shenzhen CDC  | clinicaï isolates |
| <i>Enteroggregative E.coli</i>        | 1 | Shenzhen CDC  | clinicaï isolates |
| <i>Enteroinvasive E.coli</i>          | 1 | Shenzhen CDC  | clinicaï isolates |
| <i>Enterohemolysin E.coli</i>         | 1 | Shenzhen CDC  | clinicaï isolates |
| <i>Enteropathogenic E.coli</i>        | 1 | Shenzhen CDC  | clinicaï isolates |

---

Table S2 Hybridization probe sequences for the ten pathogenic Vibrios.

| Type                             | Fluorescence channel (Tm) | Probe sequence (5'→3')                                                               |
|----------------------------------|---------------------------|--------------------------------------------------------------------------------------|
| IAC                              | (FAM, 53.0)               | Detection probe: FAM-CCGGTGAAGGCTGAGCGATGAAGGACC-BHQ1                                |
|                                  |                           | L:GTGGCAGGGCGCTACGAACAATCCTA <u>CCGGTGTAGGTTGAGCCATCAAGGACCGATCGCAT</u>              |
|                                  |                           | GACTCAGTCATCGTGAAA<br>R: GAAAGGCACAAC TTTGTAGAGATTTCTGTTGAGATTGGATCTTGCTGGGC         |
| <i>Plesiomons shigelloides</i>   | (FAM, 57.5)               | L:GTGGCAGGGCGCTACGAACAATCCTA <u>CCGGTGTAGGCTCAGCGATCAAGGACCCAACCCT</u>               |
|                                  |                           | TTGCAAAC TCCGAATACCGTAGA<br>R: GTGCTATCCGGGAGACACACGGCGGGTTGAGATTGGATCTTGCTGGGC      |
|                                  |                           | L:GTGGCAGGGCGCTACGAACAATCCTA <u>CCGGTGATGGCTGACCGATCAAGGACCGCGGCAG</u>               |
| <i>Aeromonas</i>                 | (FAM, 59.5)               | CGGAAAGTAGCTTGCTACT<br>R: TTTGCCGGCGAGCGGCGGACGGGTGAGTAATTGAGATTGGATCTTGCTGGGC       |
|                                  |                           | L:GTGGCAGGGCGCTACGAACAATCCTA <u>CCGGTGATGGCTGAGCGATTAAGGACCGGYTGAC</u>               |
|                                  |                           | ATCCTACATGACTGTGAACATTAAT<br>R: GATAAAGACTATACAATGGCAGCGGTGTCTGTGAGATTGGATCTTGCTGGGC |
| <i>V.parahaemolyticus</i><br>Tdh | (FAM, 62.5)               | Detection probe: ROX-ACGACTCTGGCTGCTCGTTCGTGACG-BHQ2                                 |
|                                  |                           | L:GTGGCAGGGCGCTACGAACAATCCTA <u>ACGACTATGGCTTCTCGTTGGTGACGTAGATGATG</u>              |
|                                  |                           | ACAGCACGGGAGCCGGCATT<br>R: CATCTGAATGATCAACTCGGTTATCGTCAGTGAGATTGGATCTTGCTGGGC       |
| <i>V. cholerae</i>               | (ROX, 52.5)               | L:GTGGCAGGGCGCTACGAACAATCCTA <u>ACGACTCTAGCTTCTCGTTAGTGACGCGCCGTCATA</u>             |
|                                  |                           | CTGCCTATTTGTGTCATTTTGT<br>R: CATCTGAATGATCAACTCGGTTATCGTCAGTGAGATTGGATCTTGCTGGGC     |
|                                  |                           | L:GTGGCAGGGCGCTACGAACAATCCTA <u>ACGACTCTAGCTTCTCGTTAGTGACGCGCCGTCATA</u>             |
| <i>V. fluvialis</i>              | (ROX, 55.5)               | CTGCCTATTTGTGTCATTTTGT<br>R: CATCTGAATGATCAACTCGGTTATCGTCAGTGAGATTGGATCTTGCTGGGC     |

|                            |             |                                                                                                           |
|----------------------------|-------------|-----------------------------------------------------------------------------------------------------------|
|                            |             | R: ACGACGGCTTCGCAGTCTAAATTTTCGATGAGATTGGATCTTGCTGGGC                                                      |
| <i>V. vulnificus</i>       | (ROX, 61.5) | L:GTGGCAGGGCGCTACGAACAATCCTA <u>ACGACTCTAGCTGCTTGTTTCGTGACGGAGCAACA</u><br>ACGATCTCTGCCTAGATGTTTAT        |
|                            |             | R: GGTGAGAACGGTGACAAAACGGTTGTGAGATTGGATCTTGCTGGGC                                                         |
| <i>V. parahaemolyticus</i> | (ROX, 65.5) | L:GTGGCAGGGCGCTACGAACAATCCTA <u>ACGACTCTGTCTTCTCGTTCGTGACGAACCAGAAG</u><br>CGCCAGTAGTACCTGAAAAAGCA        |
|                            |             | R: CCTGTGGCTTCTGCTGTGAATCCTTGGATTTGAGATTGGATCTTGCTGGGC                                                    |
| <i>V. mimicus</i>          | (ROX, 69.5) | L:GTGGCAGGGCGCTACGAACAATCCTA <u>ACGACTCTAGCTGCTCGTTCGTGACGCACACAACA</u><br>TCAAGGATGACGACGGTAA            |
|                            |             | R: CCCACGAGAAGCATTCAAACCTGGGTTTTGAGATTGGATCTTGCTGGGC                                                      |
| <i>V. alginolyticus</i>    | (ROX, 72.5) | L:GTGGCAGGGCGCTACGAACAATCCTA <u>ACGACTCTGGCTGCTCGTTCGTGACGGAATGATCA</u><br>ATACGCCCAGCACTGGTATAT          |
|                            |             | R: GCGCAATGCGGTTAATGGTGTTTTCACTATTGAGATTGGATCTTGCTGGGC                                                    |
| <hr/>                      |             |                                                                                                           |
|                            |             | Detection probe: Cy5-CGGTGAGGCCCTTGGCAGGTTGTATCACCC-BHQ2                                                  |
| O1 <i>V. cholerae</i>      | (CY5 55.0)  | L:GTGGCAGGGCGCTACGAACAATCCTA <u>CGGTGAGGCTCTTGACAGTTTGGGATCACCCGAG</u><br>GAAGCAAAAATGGCTGGCTAACCAA       |
|                            |             | R: CCATTAGAAGCTATTCTTGGTTTAATCAATGAAGCTGAGATTGGATCTTGCTGGGC                                               |
| O139 <i>V. cholerae</i>    | (CY5, 62.5) | L:GTGGCAGGGCGCTACGAACAATCCTA <u>CGGTGAGGACCTTGGCAAGTTGGTATCACCC</u> CAGA<br>TCGTGCTACGATGGCGTGTTCATTA     |
|                            |             | R: GAAGGGCGGGTTCCTTGTAGACCATGAGATTGGATCTTGCTGGGC                                                          |
| <i>V. cholerae</i><br>CTX  | (CY5, 68.5) | L:GTGGCAGGGCGCTACGAACAATCCTA <u>CGGTGAAGCCCTTGGCAGGTTGGTATCACCCGATG</u><br>ATGGATATGTTTCCACCTCAATTAGTTTGA |
|                            |             | R: GAAGTGCCCACTTAGTGGGTCAAACCTATATTGTTGAGATTGGATCTTGCTGGGC                                                |

Table S3 Sequences of primers and probes for the MLMA assay in the study

| Name <sup>a</sup>   | Sequence(5'-3')                         | Amount (μM) |
|---------------------|-----------------------------------------|-------------|
| universal primer F  | GTGGCAGGGCGCTACGAACAAT                  | 0.015μM     |
| universal primer R  | GCCCAGCAAGATCCAATCTCA                   | 0.4μM       |
| Detection probe FAM | FAM-CCGGTGAAGGCTGAGCGATGAAGGACC-BHQ1    | 0.16μM      |
| Detection probe ROX | ROX-ACGACTCTGGCTGCTCGTTCGTGACG-BHQ2     | 0.08μM      |
| Detection probe Cy5 | Cy5-CCGGTGAAGGCTTGGCAGGTTGTATCACCC-BHQ2 | 0.16μM      |

<sup>a</sup> F: forward primer. R: reverse primer.

Table S4 Primer and probe sequences for monoplex real-time PCR assay in this study

| Species                        | Target gene | Primer/Probe Sequence <sup>a</sup> |                                                                                             | Amplicon size (bp) | Reference |
|--------------------------------|-------------|------------------------------------|---------------------------------------------------------------------------------------------|--------------------|-----------|
| <i>Vibrio cholerae</i>         | <i>hlyA</i> | F<br>R<br>P                        | ACTCGGTTATCGTCAGTTGG<br>CGCTTTATTGTTTCGATGCGTTA<br>FAM-CCCCGATAATCTTGGGCAATCGCATCGGGG-BHQ1  | 141                | [1]       |
| <i>Vibrio cholerae</i>         | <i>CTX</i>  | F<br>R<br>P                        | TCCGGAGCATAGAGCTTGGGA<br>TCGATGATCTTGGAGCATTCC<br>FAM-CCGTGGATTTCATCATGCACCGCCACGG-BHQ1     | 120                | [1]       |
| <i>Vibrio parahaemolyticus</i> | <i>toxR</i> | F<br>R<br>P                        | AAGCGCCAGTAGTACCTGA<br>CCAATCTGACGGAAGTACTGAGATT<br>FAM-CGGCAAATCGGTAGTAATAGTGCCG-BHQ1      | 185                | [2]       |
| <i>Vibrio parahaemolyticus</i> | <i>tdh</i>  | F<br>R<br>P                        | AAACATTTGCCTTTGAGCTTCCA<br>CTCGAACAACAACAATATCTCATCAG<br>FAM-CCGGGGTGTCCCTTTTCCTGCCCGG-BHQ1 | 74                 | [3]       |
| <i>Vibrio fluvialis</i>        | <i>toxR</i> | F<br>R<br>P                        | GACGCTTGGCAGTGTCAAC<br>GTGCATTCCACCATATTTTCTTACG<br>FAM-TGTCAGCACGCAATCAATCACCCG-BHQ1       | 113                | [4]       |

<sup>a</sup>F, R and P represent forward primer, reverse primer and detection probe, respectively.

## References

- Huang, J., et al., *Quadruplex Real-Time PCR Assay for Detection and Identification of Vibrio cholerae O1 and O139 Strains and Determination of Their Toxigenic Potential*. Applied and Environmental Microbiology, 2009. **75**(22): p. 6981-6985.
- Hu, Q., et al., *A Modified Molecular Beacons-Based Multiplex Real-Time PCR Assay for Simultaneous Detection of Eight Foodborne Pathogens in a Single Reaction and Its Application*. Foodborne Pathogens and Disease, 2014. **11**(3): p. 207-214.
- Blackstone, G.M., et al., *Detection of pathogenic Vibrio parahaemolyticus in oyster enrichments by real time PCR*. Journal of Microbiological Methods, 2003. **53**(2): p. 149-155.
- Jia, Q., et al., *Detection of Vibrio fluvialis with Taqman real time PCR assay*. Chinese Journal of Public Health, 2011. **27**(3): P. 378-380. In Chinese.

Table S5 The artificial tag sequences with unique Tm values in three fluorescent channels

| Fluorescence | The label sequence                      | Temperature(Tm °C) |
|--------------|-----------------------------------------|--------------------|
|              | ROX-ACGACTCTGGCTGCTCGTTCGTGACG-BHQ2     |                    |
|              | ACGACTCTGGCTGCTCGTTCGTGACG              | 72.5               |
|              | ACGACTCTAGCTGCTCGTTCGTGACG              | 69.5               |
|              | ACGACTCTAGCTGCTTGTTCGTGACG              | 65.5               |
| ROX          | ACGACTCTAGCTTCTCGTTAGTGACG              | 61.5               |
|              | ACGACTCTGTCTTCTCGTTCGTGACG              | 55.5               |
|              | ACGACTATGGCTTCTCGTTGGTGACG              | 52.5               |
|              | FAM-CCGGTGAAGGCTGAGCGATGAAGGACC-BHQ1    |                    |
|              | CCGGTGATGGCTGAGCGATTAAGGACC             | 62.5               |
|              | CCGGTGATAGGCTCAGCGATCAAGGACC            | 59.5               |
| FAM          | CCGGTGATGGCTGACCGATCAAGGACC             | 57.5               |
|              | CCGGTGATAGGTTGAGCCATCAAGGACC            | 53                 |
|              | Cy5-CGGTGAGGCCCTTGGCAGGTTGTATCACCC-BHQ2 |                    |
|              | CGGTGAGGCTCTTGACAGTTTGGGATCACCC         | 55                 |
|              | CGGTGAGGACCTTGGCAAGTTGGTATCACCC         | 62.5               |
| Cy5          | CGGTGAAGCCCTTGGCAGGTTGGTATCACCC         | 68                 |

Table S6 The discrepant results between the MLMA assay and conventional method

| No. | Sample ID | conventional method | the MLMA assay                                                                       | Singleplex real-time PCR<br>Ct value       |
|-----|-----------|---------------------|--------------------------------------------------------------------------------------|--------------------------------------------|
| 1   | SZ210     | ND                  | 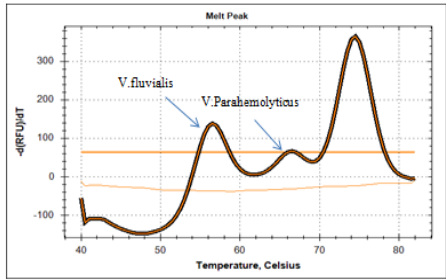   | 18 (V.fluvialis)<br>21 (V.Parahemolyticus) |
| 2   | SZ229     | ND                  |    | 19 (V.Parahemolyticus)                     |
| 3   | SZ248     | ND                  |   | 21 (V.Parahemolyticus)                     |
| 4   | SZ254     | ND                  |  | 23 (V.Parahemolyticus)                     |
| 5   | SZ261     | ND                  |  | 19 (V.Parahemolyticus)                     |
| 6   | SZ263     | ND                  |  | 18 (V.Parahemolyticus)                     |

ND: not detected



Figure S7 Simultaneous identification of pathogenic Vibrios in mixed infection

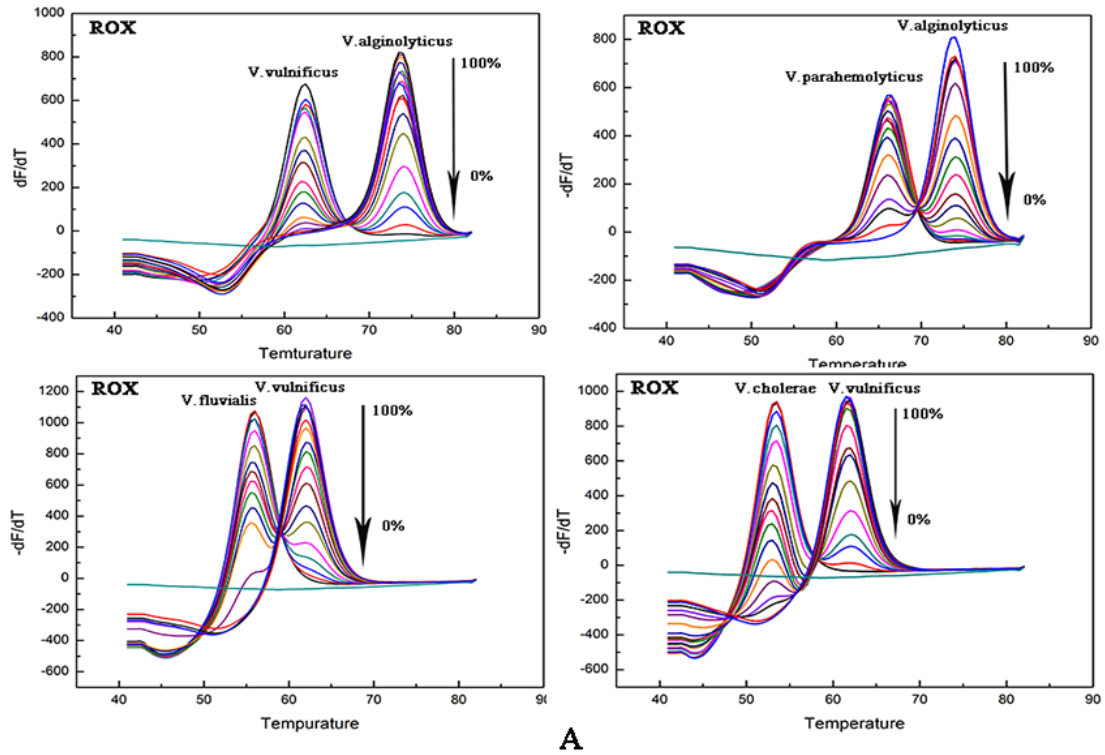

A

Figure A: *V. vulnificus* and *V. alginolyticus*, *V. parahaemolyticus* and *V. alginolyticus*, *V. fluvialis* and *V. vulnificus*, *V. cholerae* and *V. vulnificus* were identified in the same fluorescence channel, The MLMA assay was performed by various percentage ratios of the two species (100:0, 97:3, 95:5, 90:10, 80:20, 70:30,60:40, 50:50, 40:60, 30:70,20:80, 10:90, 5:95, 3:97, 0:100), and DEPC water was used as a negative control.

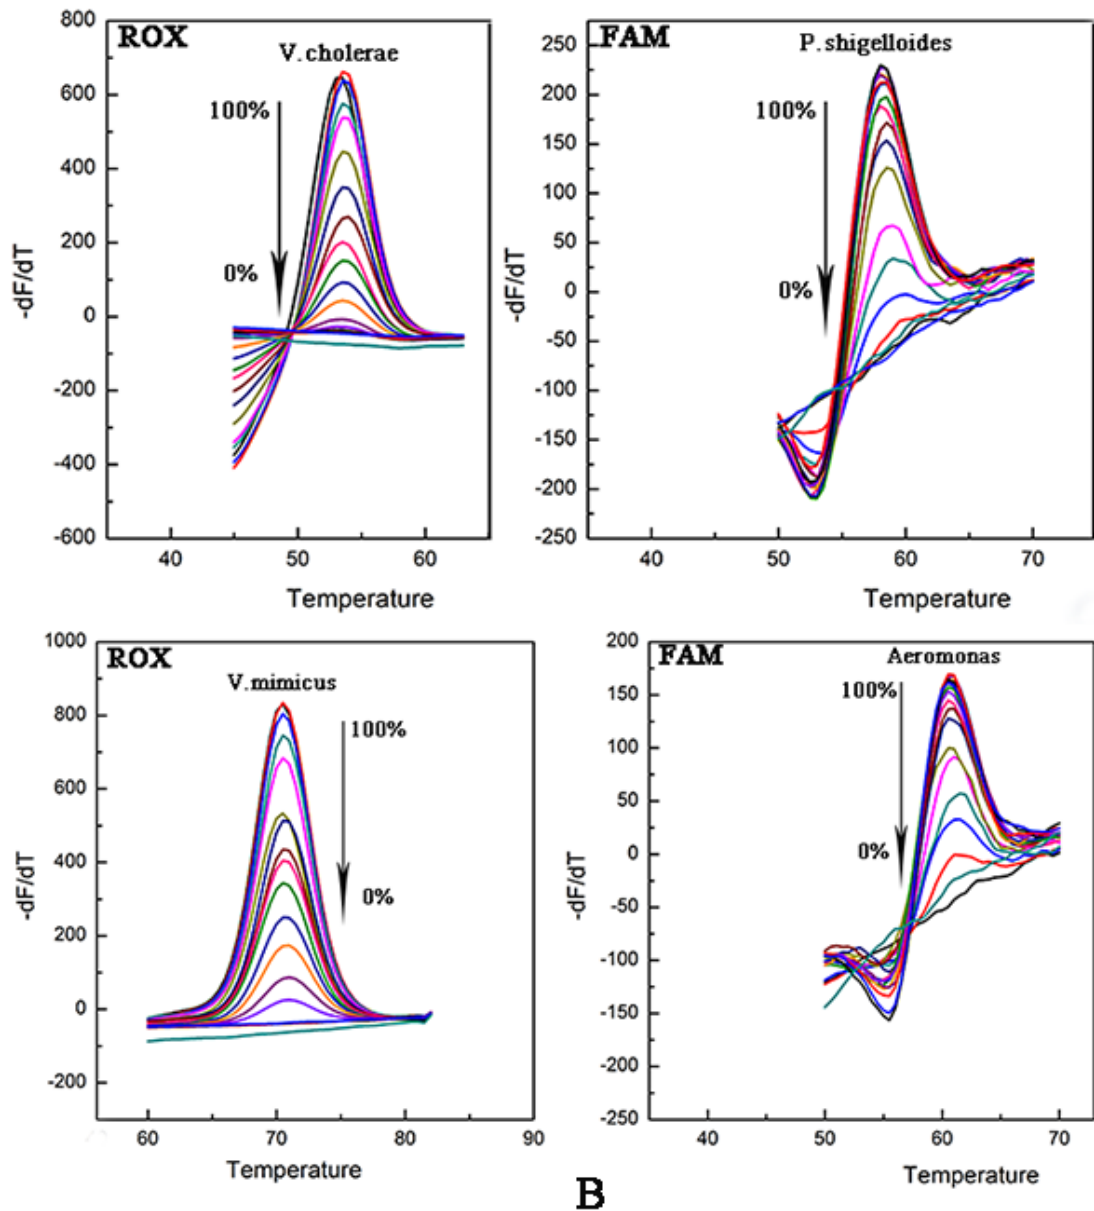

Figure B: *V. cholera* and *P. shigelloides*, *V. mimicus* and *Aeromonas* were identified in the same fluorescence channel, The MLMA assay was performed by various percentage ratios of the two species (100:0, 97:3, 95:5, 90:10, 80:20, 70:30,60:40, 50:50, 40:60, 30:70,20:80, 10:90, 5:95, 3:97, 0:100), and DEPC water was used as a negative control.
